# Supplementary material for: A dealloying process of core–shell Au@AuAg nanorods for porous nanorods with enhanced catalytic activity
Source: Royal Society of Chemistry journal article supplement (doi:10.1039/c3nr04304e), 2013-01-01
Supplement: c3nr04304e.pdf [file c3nr04304e.pdf]

## Supporting Information for Dealloying Process of Core-shell Au@AuAg Nanorods for Porous Nanorods with Tunable Optical Properties and Enhanced Catalytic Activity

Xia Guo,<sup>a</sup> Wei Ye,<sup>b</sup> Hongyan Sun,<sup>b</sup> Qiao Zhang<sup>a</sup> and Jian Yang<sup>a,b\*</sup>

[a] School of Chemistry and Chemical Engineering, South China University of Technology, Guangzhou 510640, PRC

[b] Key Laboratory of Colloid and Interface Chemistry, Ministry of Education School of Chemistry and Chemical Engineering, Shandong University, Jinan 250100, PRC

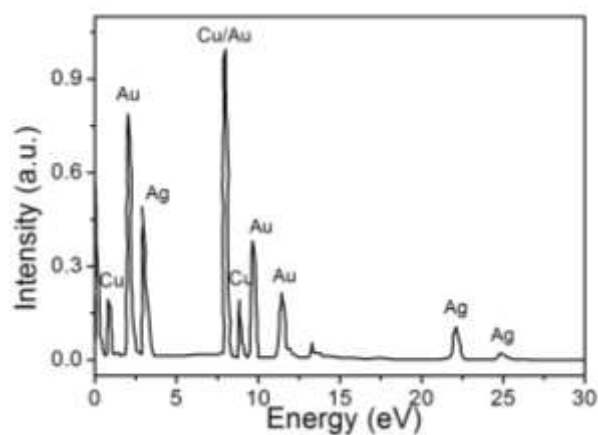

Figure S1 EDS spectrum of the core-shell Au@AuAg nanorods.

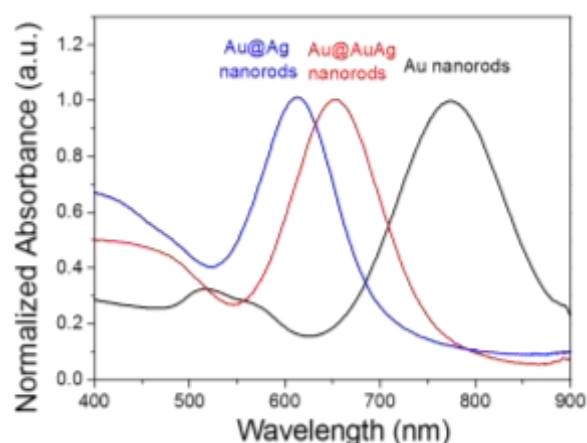

Figure S2. Normalized absorption spectra of the gold nanorods, Au@AuAg nanorods and Au@Ag nanorods.

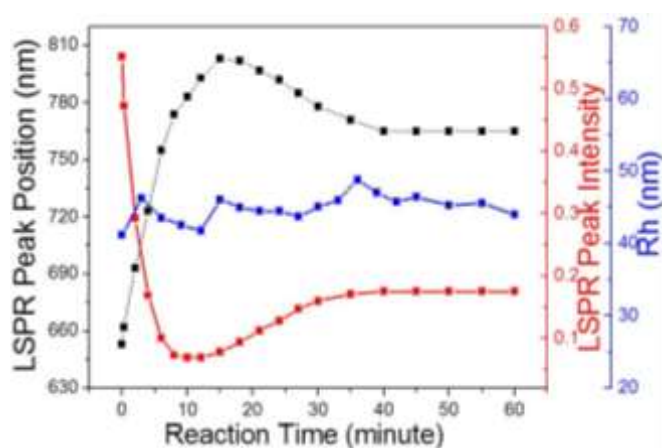

**Figure S3** The temporal evolution of the LSPR peak positions (black squares), the peak intensity (red squares) and the average hydrodynamic radius (blue squares) during the reaction.

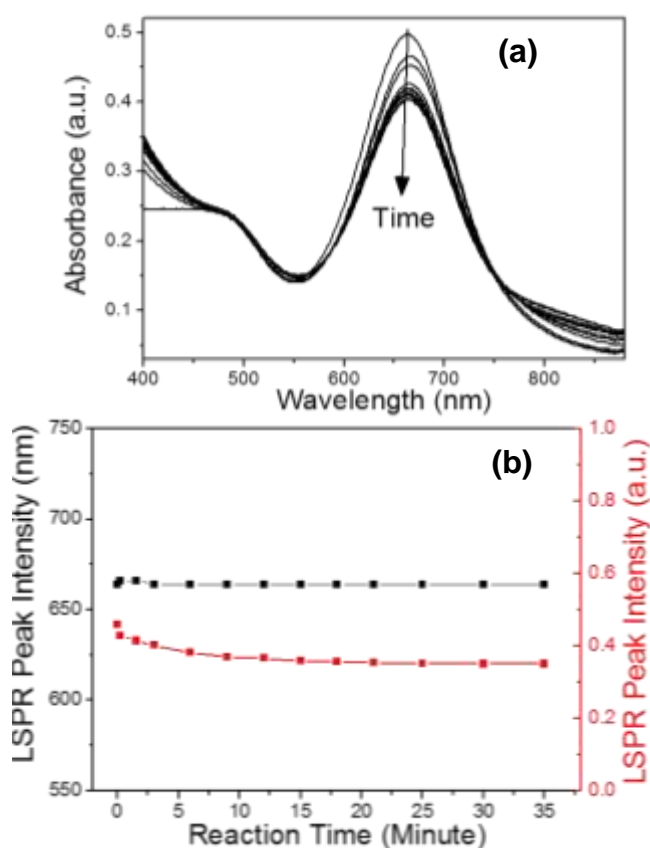

**Figure S4** (a) The UV-vis absorption spectra of the solution in which Au@Au<sub>7.5</sub>Ag<sub>7.5</sub> core-shell nanorods reacted with 100  $\mu$ L of 10 mM Fe(NO<sub>3</sub>)<sub>3</sub>. The absorption spectra were measured at a regular interval. (b) The temporal evolution of the LSPR (longitudinal surface plasmon resonance) peak positions (black squares) and the peak intensity (red hollow squares) during the reaction.

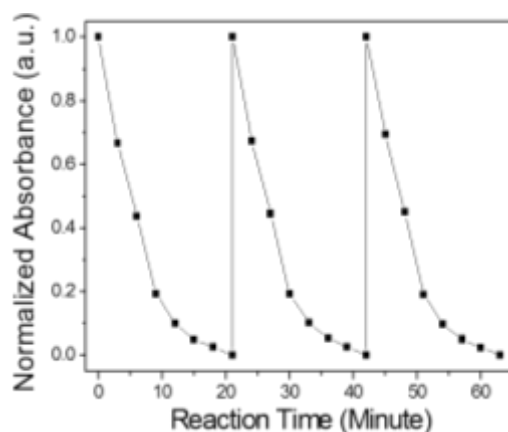

**Figure S5** The three-run test of the reduction 4-nitrophenol by using solid Au@porous AuAg nanorods

**Table S1.** The average length and diameter of the gold nanorods (NRs), the core-shell Au@AuAg nanorods, the porous nanorods, rough nanorods and smooth nanorods obtained from the dealloying process.

|             | Au nanorods | Core-shell Au@AuAg nanorods | Porous nanorods | Rough nanorods | Smooth nanorods |
|-------------|-------------|-----------------------------|-----------------|----------------|-----------------|
| Length/nm   | 42.35±4.70  | 52.91±4.02                  | 52.87±4.73      | 51.38±4.39     | 48.51±3.83      |
| Diameter/nm | 13.51±1.16  | 21.13±2.38                  | 21.05±1.48      | 20.55±1.86     | 16.41±1.60      |

**Table S2.** The molar ratio of Ag/Au from the EDS spectra of the core-shell Au@AuAg nanorods, the porous nanorods, rough nanorods and smooth nanorods obtained from the dealloying process.

|       | Core-shell Au@AuAg nanorods | Porous nanorods | Rough nanorods | Final nanorods |
|-------|-----------------------------|-----------------|----------------|----------------|
| Ag/Au | 48:52                       | 33:67           | 16.7:83.3      | 0.7:99.3       |
